# Supplementary material for: Kidins220 sets the threshold for survival of neural stem cells and progenitors to sustain adult neurogenesis
Source: PubMed Central journal article supplement (PMC10403621; doi:10.1038/s41419-023-05995-7), 2023-08-04
Supplement: 41419_2023_5995_MOESM3_ESM.pdf [file 41419_2023_5995_MOESM3_ESM.pdf]

Dear Sir/Madam,

As per instructions provided by the Editorial Office, I have requested agreement from all authors to the new additions in the author list. We have included the agreement from the newly added authors as well just in case this was also necessary.

I have collected their replies by email and have generated a combined PDF document that follows my own agreement statement (below).

**I, EVA PORLAN, agree to the addition of Ana Simón-García and Dr. Celia López-Menéndez to the list of authors of the manuscript CDDIS-22-3643RR.**

Sincerely,

Eva Porlan

--

Eva Porlan, PhD  
Associate Professor  
Group Leader Neural Stem Cells in the Adult Brain  
Dept. de Biología Molecular y Centro de Biología Molecular "Severo Ochoa"  
Universidad Autónoma de Madrid  
C/ Nicolás Cabrera, 1 28049 - Madrid  
[eva.porlan@cbm.uam.es](mailto:eva.porlan@cbm.uam.es)  
[eva.porlan@uam.es](mailto:eva.porlan@uam.es)  
Tel: +34 911 964 629

Asunto: Re: CDDis quality check

De: Teresa Iglesias Vacas <tiglesias@iib.uam.es>

Fecha: 05/07/2023, 18:15

Para: Eva Porlan <eva.porlan@uam.es>, Beatriz Martí <beatriz.marti.prado@gmail.com>, Ana Laura Barrios <anaurabarrios@yahoo.es>, Coral Lopez Fonseca <coral.lopez@cbm.csic.es>, Julia Pose Utrilla <jpose@ext.iib.uam.es>, berta.alcover@cbm.csic.es, giampietro.schiavo@ucl.ac.uk, fcesca@units.it, Isabel Fariñas <isabel.farinas@uv.es>, mcampanero@cbm.csic.es, clopez@iib.uam.es, Ana Simón García <asimon@iib.uam.es>, bmarti1@terraroja.cat

**I, TERESA IGLESIAS agree to the addition of Ana Simón-García and Dr. Celia López-Menéndez to the list of authors of the manuscript CDDIS-22-3643RR.**

--

Teresa Iglesias Vacas, Ph.D.

Group Leader

Novel Targets in Neurodegeneration and Neuroprotection Lab

Endocrine and Nervous System Pathophysiology Department

Instituto de Investigaciones Biomédicas "Alberto Sols" (CSIC-UAM)

and CIBERNED (ISCIII)

C/ Arturo Duperier, 4 – 28029 Madrid (Spain)

Tel: (+34) 91.585.44.87

email: [tiglesias@iib.uam.es](mailto:tiglesias@iib.uam.es)

---

**Asunto:** Fwd: CDDis quality check  
**De:** Ana M del Puerto <delpuerto.ana@inia.csic.es>  
**Fecha:** 05/07/2023, 19:05  
**Para:** <eva.porlan@cbm.uam.es>  
**CC:** <tiglesias@iib.uam.es>

***I, Ana del Puerto, agree to the addition of Ana Simón-García and Dr. Celia López-Menéndez to the list of authors of the manuscript CDDIS-22-3643RR.***

Asunto:Re: CDDis quality check  
Fecha: Wed, 05 Jul 2023 16:56:06 +0200  
De: CORAL LOPEZ FONSECA <coral.lopez@cbm.csic.es>  
Para: Eva Porlan <eva.porlan@uam.es>  
CC: Teresa Iglesias Vacas <tiglesias@iib.uam.es>

Dear Teresa and Eva,

Since the author list has changed with the addition of Ana Simón-García and Celia López-Menéndez, I confirm below that I am in agreement with these changes:

**I, Coral Lopez-Fonseca, agree to the addition of Ana Simón-García and Dr. Celia López-Menéndez to the list of authors of the manuscript CDDIS-22-3643RR.**

Best,

—

Coral Lopez Fonseca  
Estudiante de Doctorado (PhD Candidate)  
*Procesos Fisiologicos y Patologicos - Neuropatologia Molecular*  
Centro de Biología Molecular Severo Ochoa (Laboratorio 306)  
Universidad Autónoma de Madrid • Campus de Cantoblanco  
c/ Nicolas Cabrera, 1 - 28049 Madrid  
Tel.: +34 91 196 46 55 - coral.lopez@cbm.csic.es

**Asunto:** Re: CDDis quality check  
**De:** Ana Simón García <asimon@iib.uam.es>  
**Fecha:** 05/07/2023, 17:05  
**Para:** Eva Porlan <eva.porlan@uam.es>  
**CC:** Teresa Iglesias Vacas <tiglesias@iib.uam.es>

***I, Ana Simón García agree to the addition of Ana Simón-García and Dr. Celia López-Menéndez to the list of authors of the manuscript CDDIS-22-3643RR.***

Ana Simón García  
Ph.D. Student  
Novel Targets in Neurodegeneration and Neuroprotection Lab  
Endocrine and Nervous System Pathophysiology Department  
Instituto de Investigaciones Biomédicas Alberto Sols" (CSIC-UAM)  
and CIBERNED (ISCIII)  
C/ Arturo Duperier, 4  
Madrid 28029  
Spain  
Re: CDDis quality check  
1 de 2 06/07/2023, 11:41  
Tel.: +34 915854488  
E-mail: [asimon@iib.uam.es](mailto:asimon@iib.uam.es)

Asunto: Re: CDDis quality check

De: Beatriz MARTÍ <bmarti1@terrajoja.cat>

Fecha: 05/07/2023, 19:34

Para: CESCA FABRIZIA <fcesca@units.it>

CC: Teresa Iglesias Vacas <tiglesias@iib.uam.es>, Eva Porlan <eva.porlan@uam.es>, Beatriz

Martí <beatriz.marti.prado@gmail.com>, Ana Laura Barrios

<anaurabarrios@yahoo.es>, Coral Lopez Fonseca <coral.lopez@cbm.csic.es>, Julia Pose

Utrilla <jpose@ext.iib.uam.es>, "berta.alcover@cbm.csic.es"

<berta.alcover@cbm.csic.es>, "giampietro.schiavo@ucl.ac.uk"

<giampietro.schiavo@ucl.ac.uk>, Isabel Fariñas <isabel.farinas@uv.es>,

"mcampanero@cbm.csic.es" <mcampanero@cbm.csic.es>, "clopez@iib.uam.es"

<clopez@iib.uam.es>, Ana Simón García <asimon@iib.uam.es>

**I, BEATRIZ MARTÍ PRADO agree to the addition of Ana Simón-García and Dr. Celia López-Menéndez to the list of authors of the manuscript CDDIS-22-3643RR.**

--

-----  
Beatriz Marí

Tutora de 1r ESO - B

Departament d'experimentals

Institut Terra Roja

**De:** Ana Laura Barrios <analaubarrios@yahoo.es>

**Fecha:** 06/07/2023, 20:06

**Para:** Eva Porlan <eva.porlan@uam.es>, BERTA ALCOVER SANCHEZ  
<berta.alcover@cbm.csic.es>

**CC:** Beatriz Martí <beatriz.marti.prado@gmail.com>, Coral Lopez Fonseca  
<coral.lopez@cbm.csic.es>, Julia Pose Utrilla <jpose@iib.uam.es>,  
"giampietro.schiavo@ucl.ac.uk" <giampietro.schiavo@ucl.ac.uk>, "fcesca@units.it"  
<fcesca@units.it>, Isabel Fariñas <isabel.farinas@uv.es>,  
"mcampanero@cbm.csic.es" <mcampanero@cbm.csic.es>, "clopez@iib.uam.es"  
<clopez@iib.uam.es>, Ana Simón García <asimon@iib.uam.es>,  
"bmarti1@terraroja.cat" <bmarti1@terraroja.cat>, Teresa Iglesias <tiglesias@iib.uam.es>

**I Ana Barrios-Muñoz agree to the addition of Ana Simón-García and Dr. Celia López-Menéndez to the list of authors of the manuscript CDDIS-22-3643RR.\***

**Asunto:** I agree

**De:** JULIA POSE UTRILLA <jpose@cbm.csic.es>

**Fecha:** 05/07/2023, 19:07

**Para:** eva.porlan@uam.es

**CC:** tiglesias@iib.uam.es

I, Julia Pose-Utrilla agree to the addition of Ana Simón-García and Dr. Celia López-Menéndez to the list of authors of the manuscript CDDIS-22-3643RR.



Asunto: Re: CDDis quality check

De: Celia López Menéndez <clopez@iib.uam.es>

Fecha: 07/07/2023, 12:29

Para: Isabel.Farinas@uv.es

CC: Beatriz\_Martí <beatriz.marti.prado@gmail.com>, Ana Laura Barrios <anaurabarrios@yahoo.es>, Coral Lopez Fonseca <coral.lopez@cbm.csic.es>, berta.alcover@cbm.csic.es, giampietro.schiavo@ucl.ac.uk, fcesca@units.it, mcampanero@cbm.csic.es, Ana Simón García <asimon@iib.uam.es>, bmarti1@terraroja.cat, Eva Porlan <eva.porlan@uam.es>, Teresa Iglesias <tiglesias@iib.uam.es>

**I, Celia López-Menéndez agree to the addition of Ana Simón-García and Dr. Celia López-Menéndez to the list of authors of the manuscript CDDIS-22-3643RR.**

Best, Celia

Asunto: Re: CDDis quality check

De: BERTA ALCOVER SANCHEZ <berta.alcover@cbm.csic.es>

Fecha: 06/07/2023, 8:57

Para: Eva Porlan <eva.porlan@uam.es>

CC: Beatriz Martí <beatriz.marti.prado@gmail.com>, Ana Laura Barrios

<anaurabarrios@yahoo.es>, Coral Lopez Fonseca <coral.lopez@cbm.csic.es>, Julia

Pose Utrilla <jpose@iib.uam.es>, giampietro.schiavo@ucl.ac.uk, fcesca@units.it, Isabel Fariñas

<isabel.farinas@uv.es>, mcampanero@cbm.csic.es,

clopez@iib.uam.es, Ana Simón García <asimon@iib.uam.es>, bmarti1@terraroja.cat, Teresa

Iglesias <tiglesias@iib.uam.es>

**\*I, BERTA ALCOVER-SANCHEZ agree to the addition of Ana Simón-García and Dr. Celia López-Menéndez to the list of authors of the manuscript CDDIS-22-3643RR.\***

Berta Alcover Sánchez

PhD Student in Molecular Biosciences

Personal de Investigación

Neuropatología Molecular

Centro de Biología Molecular Severo Ochoa - Laboratorio 305

C/ Nicolás Cabrera, 1 - 28049 Madrid

Tel.: +34 91 196 4650 - [berta.alcover@cbm.csic.es](mailto:berta.alcover@cbm.csic.es)

Asunto: Re: CDDis quality check

De: CESCA FABRIZIA <fcesca@units.it>

Fecha: 05/07/2023, 18:40

Para: Teresa Iglesias Vacas <tiglesias@iib.uam.es>

CC: Eva Porlan <eva.porlan@uam.es>, Beatriz Martí <beatriz.marti.prado@gmail.com>, Ana

Laura Barrios <anaurabarrios@yahoo.es>, Coral Lopez Fonseca

<coral.lopez@cbm.csic.es>, Julia Pose Utrilla <jpose@ext.iib.uam.es>,

"berta.alcover@cbm.csic.es" <berta.alcover@cbm.csic.es>,

"giampietro.schiavo@ucl.ac.uk" <giampietro.schiavo@ucl.ac.uk>, Isabel Fariñas

<isabel.farinas@uv.es>, "mcampanero@cbm.csic.es"

<mcampanero@cbm.csic.es>, "clopez@iib.uam.es" <clopez@iib.uam.es>, Ana Simón García

<asimon@iib.uam.es>, "bmarti1@terraroja.cat"

<bmarti1@terraroja.cat>

**I, FABRIZIA CESCA agree to the addition of Ana Simón-García and Dr. Celia López-Menéndez to the list of authors of the manuscript CDDIS-22-3643RR.**

-----  
Fabrizia Cesca, PhD

Prof.ssa Associata | Associate Professor

Delegata DSV per la mobilità internazionale | Dept. Delegate for Int. Mobility

Dipartimento di Scienze della Vita | Department of Life Sciences

Università degli Studi di Trieste | University of Trieste

Building Q, room 213 - via L. Giorgieri, 5 - 34127 Trieste (Italy)

fcesca@units.it

Tel. | Ph. +39 040 558 8727

Cell. | Mob. +39 345 3598007

Skype: fabriziacesca

Asunto: Re: CDDis quality check

De: "Schiavo, Giampietro" <giampietro.schiavo@ucl.ac.uk>

Fecha: 05/07/2023, 17:07

Para: Eva Porlan <eva.porlan@uam.es>

Dear Sir/Madam,

**I, Giampietro Schiavo agree to the addition of Ana Simón-García and Dr. Celia López-Menéndez to the list of authors of the manuscript CDDIS-22-3643RR.**

Best regards

gipi

Asunto: Re: CDDis quality check

De: Miguel Campanero <mcampanero@cbm.csic.es>

Fecha: 05/07/2023, 17:07

Para: Eva Porlan <eva.porlan@uam.es>, Teresa\_Iglesias <tiglesias@iib.uam.es>

Dear Eva and Teresa,

**I, Dr. Miguel R. Campanero, agree to the addition of Ana Simón-García and Dr. Celia López-Menéndez to the list of authors of the manuscript CDDIS-22-3643RR.**

Best regards,

Miguel

--

Miguel R. Campanero, PhD

Tenured Scientist and Group Leader

AECC Researcher

Centro de Biología Molecular Severo Ochoa

CSIC-UAM

Nicolás Cabrera, 1

28049 Madrid

Spain

Tel: +34-91-196-4554

Email: [mcampanero@cbm.csic.es](mailto:mcampanero@cbm.csic.es)

WEB: <http://www.cbm.uam.es/mcampanero>

Asunto: Re: CDDis quality check

De: <Isabel.Farinas@uv.es>

Fecha: 06/07/2023, 22:32

Para: "Beatriz\_Martí" <beatriz.marti.prado@gmail.com>, "Ana Laura Barrios" <anaurabarrios@yahoo.es>, "Coral Lopez Fonseca" <coral.lopez@cbm.csic.es>, "Julia Pose Utrilla" <jpose@iib.uam.es>, berta.alcover@cbm.csic.es, giampietro.schiavo@ucl.ac.uk, fcesca@units.it, "Isabel\_Fariñas" <isabel.farinas@uv.es>, mcampanero@cbm.csic.es, clopez@iib.uam.es, "Ana Simón García" <asimon@iib.uam.es>, bmarti1@terraroja.cat, "Eva Porlan" <eva.porlan@uam.es>, "Teresa Iglesias" <tiglesias@iib.uam.es>

**I, Isabel Fariñas agree to the addition of Ana Simón-García and Dr. Celia López-Menéndez to the list of authors of the manuscript CDDIS-22-3643RR.**

Best, Isabel

--

\*\*\*\*\*

Isabel Fariñas

Biología Celular

Re: CDDis quality check

1 de 2 07/07/2023, 14:41

Universidad de Valencia

46100 Burjassot

Spain

Phone: 34-963 543784 (office) 3246 (lab)

FAX: 34-963 544372

\*\*\*\*\*
